# Supplementary material
Source: publisher figshare collection journal article supplement (https://acs.figshare.com/ndownloader/files/4184053)
Supplement: Supplementary file 1 [file 4184053]

## Supporting Information

### **Investigating the Kinetic Mechanism of Inhibition of Elongation Factor 2 Kinase (eEF-2K) by NH125: Evidence for a Common *in* *vitro* Artifact**

**Ashwini K. Devkota<sup>1</sup>, Clint D. J. Tavares<sup>1</sup>, Mangalika Warthaka<sup>2</sup>, Olga Abramczyk<sup>2</sup>, Kyle  
D. Marshall<sup>2</sup>, Tamer S. Kaoud<sup>2,3</sup>, Kivanc Gorgulu<sup>4</sup>, Bulent Ozpolat<sup>4\*</sup> and Kevin N.  
Dalby<sup>1,2,3\*</sup>**

<sup>1</sup>*Graduate Program in Cell and Molecular Biology, The University of Texas, Austin, TX 78712,*

<sup>2</sup>*Division of Medicinal Chemistry, College of Pharmacy, The University of Texas, Austin, TX  
78712,*

<sup>3</sup>*Graduate Program in Pharmacy, The University of Texas, Austin, TX 78712,*

<sup>4</sup>*Department of Experimental Therapeutics, University of Texas M. D. Anderson Cancer Center,  
Houston, TX 77030*

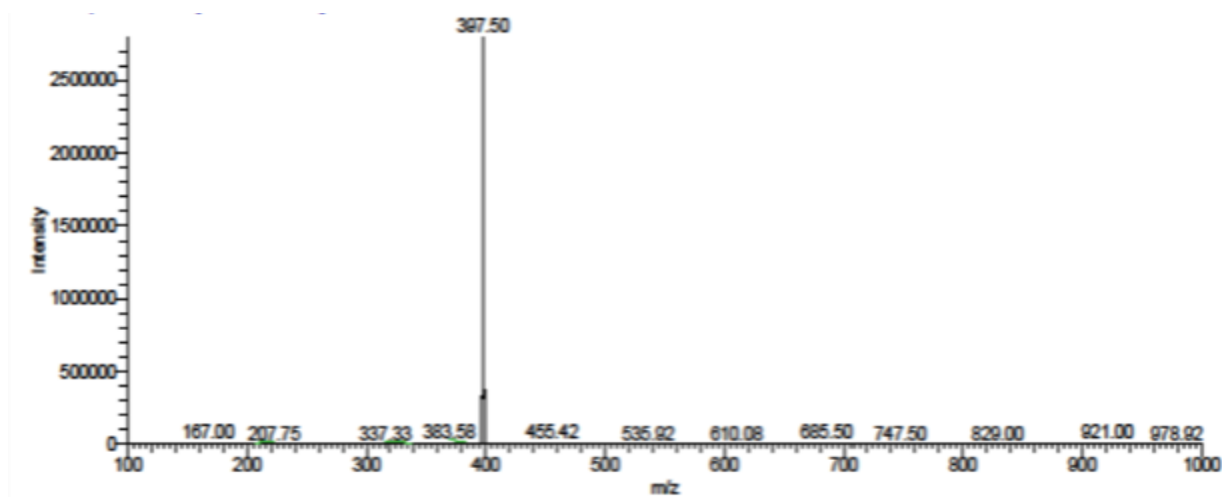

**Figure S1:** MS data of NH125. ESI-MS  $[M+H]^+$  calculated, 397.4 ; observed, 397.5.

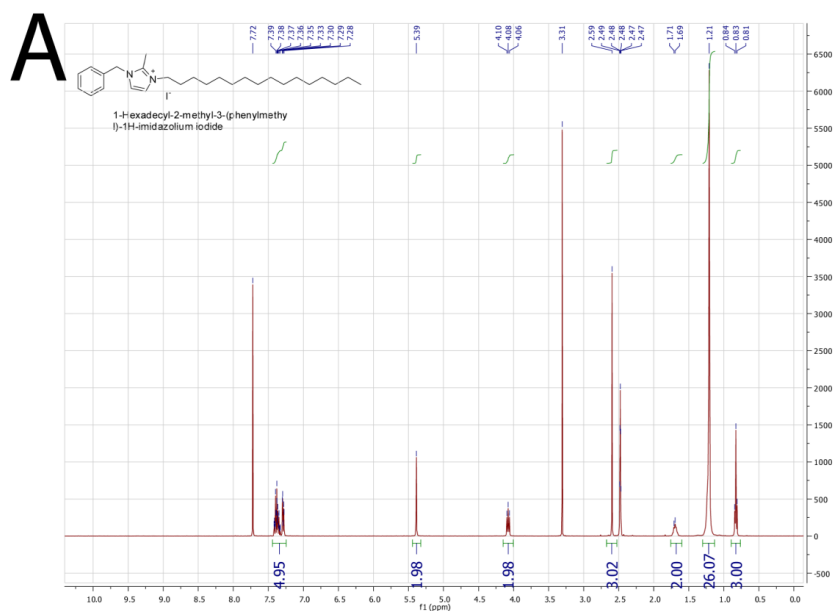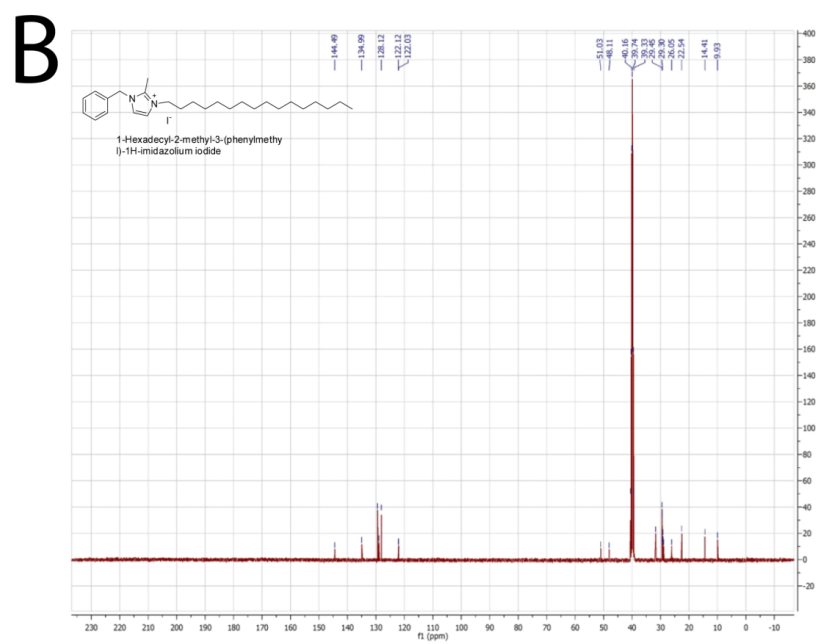

**Figure S2: NMR spectra of NH125.** White solid (1.74 g, 52.4%). A)  $^1\text{H}$  NMR (400 MHz DMSO- $d_6$ )  $\delta$  7.72 (s, 2H), 7.43-7.33 (m, 3H), 7.3 (d, 2H,  $J$  = 6.4 Hz), 5.39 (s, 2H), 4.1 (t, 2H,  $J$  = 7.2 Hz), 2.60 (s, 3H), 1.71 (br, 2H), 1.21 (br, 26H), 0.83 (t, 3H,  $J$  = 6.8 Hz); and B)  $^{13}\text{C}$  NMR (100.6 MHz DMSO- $d_6$ )  $\delta$  144.76, 135.0, 129.44, 128.92, 128.13, 122.13, 122.03, 51.03, 48.11, 31.73, 29.49, 29.45, 29.39, 29.36, 29.31, 29.15, 26.06, 22.54, 14.41, 9.94.

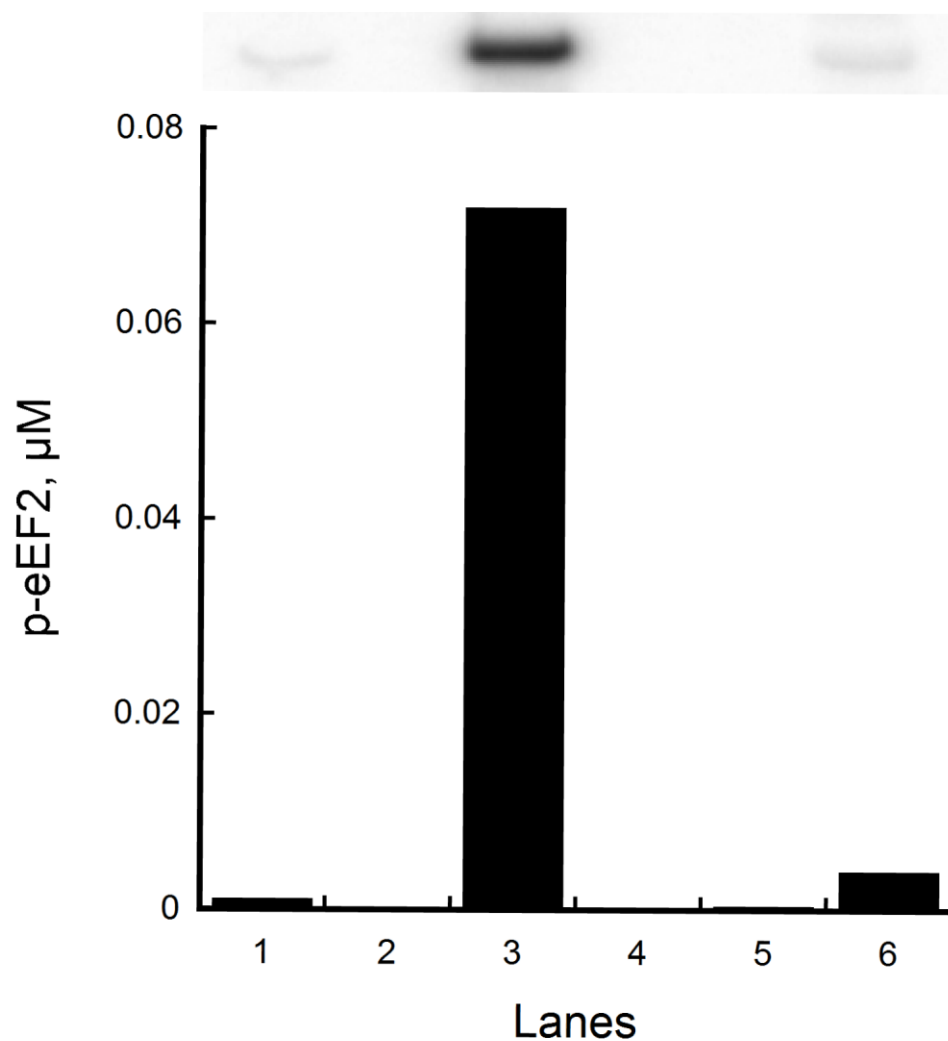

**Figure S3. Phosphorylation assays of wheat germ EF2 by eEF-2K performed at higher concentrations of NH125** (lane 3, 0  $\mu\text{M}$ ; lane 4, 50  $\mu\text{M}$ ; lane 5, 25  $\mu\text{M}$ ; lane 6, 12.5  $\mu\text{M}$ ). Control reactions with no eEF2 (lane 1) or no eEF-2K (lane 2) are also shown. Phosphorylation reactions, quenched after 5 minutes and resolved by SDS-PAGE, were visualized by autoradiography (top) and also quantified using the scintillation counter (bottom).
